# Supplementary material for: Hydra Mesoglea Proteome Identifies Thrombospondin as a Conserved Component Active in Head Organizer Restriction
Source: PubMed Central journal article supplement (PMC6079037; doi:10.1038/s41598-018-30035-2), 2018-08-06
Supplement: 41598_2018_30035_MOESM1_ESM.pdf [file 41598_2018_30035_MOESM1_ESM.pdf]

## Supplementary Information

### ***Hydra* Mesoglea Proteome Identifies Thrombospondin as a Conserved Component active in Head Organizer Restriction**

Mark Lommel, Jennifer Strompen, Andrew L. Hellewell, Gnana Prakash Balasubramanian, Elena D. Christofidou, Andrew R. Thomson, Aimee L. Boyle, Derek N. Woolfson, Kane Puglisi, Markus Hartl, Thomas W. Holstein, Josephine C. Adams and Suat Özbek

#### **Supplementary Table S1. Mesoglea proteome of *Hydra magnipapillata*.**

| No | Hma identity/<br>GB Accession No./<br>Transcript ID | Protein<br>Score | Protein                        | Domains (from CDD and InterProScan)<br>( / indicates multiple domain designations for the same<br>region)         | Reference                          |
|----|-----------------------------------------------------|------------------|--------------------------------|-------------------------------------------------------------------------------------------------------------------|------------------------------------|
| 1  | Hma2.214226<br>ABG80452<br>comp25324_c0_seq1        | 6993             | HCol-6                         | Collagen IV non-collagenous domain, Collagen triple-helix,<br>C-type lectin, WAP-type 'four-disulfide core', vWFA | J. Biol. Chem. 282:6792-6802(2007) |
| 2  | Hma2.217448<br>XP_012558958.1<br>comp27401_c0_seq1  | 5266             | Laminin, alpha                 | Laminin N-terminal domain, Laminin EGF, Laminin IV,<br>Concanavalin A-like lectin/Laminin G                       |                                    |
| 3  | Hma2.229572<br>XP_002168125.2<br>comp25312_c0_seq1  | 2971             | Laminin, beta                  | Laminin N-terminal domain, Laminin EGF, Laminin IV type B                                                         | Dev Biol. 1994 Jul;164(1):312-24.  |
| 4  | Hma2.222865<br>AAM77398<br>comp28519_c0_seq1        | 2332             | HCol-I                         | Collagen triple-helix, Fibrillar collagen C-terminal domain                                                       | J. Biol. Chem. 282:6792-6802(2007) |
| 5  | Hma2.216083<br>ABG80451<br>comp18600_c0_seq1        | 2132             | HCol-5                         | Collagen triple-helix, Fibrillar collagen C-terminal domain                                                       | J. Biol. Chem. 282:6792-6802(2007) |
| 6  | Hma2.232437<br>ABG80450<br>comp24511_c0_seq2        | 1683             | HCol-3                         | Collagen triple-helix, Fibrillar collagen C-terminal domain,<br>WAP-type 'four-disulfide core', vWFA              | J. Biol. Chem. 282:6792-6802(2007) |
| 7  | Hma2.218921<br>NP_001296598<br>comp21769_c0_seq1    | 1438             | Collagen type I, alpha chain-1 | Collagen triple-helix, Fibrillar collagen C-terminal domain,<br>WAP-type 'four-disulfide core'                    |                                    |
| 8  | Hma2.221191<br>XP_0012557210<br>comp26030_c0_seq1   | 1081             | Laminin, gamma                 | Laminin N-terminal domain, Laminin EGF, Laminin IV                                                                |                                    |

|    |                                                    |     |                                          |                                                                                                                                                             |                                            |
|----|----------------------------------------------------|-----|------------------------------------------|-------------------------------------------------------------------------------------------------------------------------------------------------------------|--------------------------------------------|
| 9  | Hma2.202536<br>XP_012565750<br>comp20380_c0_seq1   | 882 | Collagen type IV                         | Collagen IV non-collagenous domain, C-type lectin                                                                                                           | J Biol Chem. 2000 Dec 15;275(50):39589-99  |
| 10 | Hma2.213656<br>XP_012560707.1<br>comp29438_c0_seq1 | 467 | Collagen type VI-like                    | vWFA                                                                                                                                                        |                                            |
| 11 | Hma2.218942<br>XP_012558303.1<br>comp24178_c0_seq1 | 422 | HmTSP                                    | Concanavalin A-like lectin domain/Laminin G domain, EGF-like, TSP type-3 repeat, TSP C-terminal domain                                                      |                                            |
| 12 | Hma2.208898<br>XP_002154462                        | 171 | Actin, non muscle                        | Actin                                                                                                                                                       | Gene. 1989 Dec 7;84(1):55-64               |
| 13 | Hma2.206846<br>XP_002165741<br>comp7940_c0_seq1    | 125 | Selenoprotein P-like                     | Selenoprotein P N-terminal domain, Thioredoxin-like fold                                                                                                    |                                            |
| 14 | Hma2.200137<br>XP_012560867.1<br>comp16204_c0_seq1 | 117 | Novel                                    | WSC superfamily                                                                                                                                             |                                            |
| 15 | Hma2.205448<br>XP_012564433.1<br>comp1273_c0_seq1  | 93  | SecA-like                                | Protein translocase subunit SecA, SecA motor DEAD/P-loop containing nucleoside triphosphate hydrolase, Helicase C-terminal domain, Tetratricopeptide repeat |                                            |
| 16 | Hma2.226267<br>NP_001274304<br>comp11507_c0_seq1   | 90  | Nematocyst outer wall antigen (NOWA)     | CAP domain, C-type lectin, Minicollagen cysteine-rich                                                                                                       | J Cell Sci. 2002 Oct 15;115(Pt 20):3923-34 |
| 17 | Hma2.216559<br>XP_002169906.2<br>comp18662_c0_seq1 | 81  | Cnidarian proline-rich protein-1 (CPP-1) | Minicollagen cysteine-rich domain                                                                                                                           | J Biol Chem. 2012 Mar 23;287(13):9672-81   |
| 18 | Hma2.203602<br>XP_004212336.2<br>comp27961_c0_seq7 | 75  | E3 ubiquitin-protein ligase RNF213       | RNF213 protein, P-loop containing nucleoside triphosphate hydrolase                                                                                         |                                            |
| 19 | Hma2.227385<br>XP_012554267<br>comp17112_c0_seq1   | 74  | Hemicentin-related                       | Immunoglobulin (Ig), TLDC                                                                                                                                   |                                            |
| 20 | Hma2.220431<br>XP_012557586.1<br>comp26730_c0_seq3 | 73  | Centromere protein F-like                | Coiled-coil                                                                                                                                                 |                                            |
| 21 | Hma2.213111<br>XP_012560975.1<br>comp28013_c0_seq1 | 73  | Kazal-type serine proteinase inhibitor   | Thyroglobulin type I repeats, Kazal                                                                                                                         |                                            |
| 22 | Hma2.222286<br>XP_012556696.1<br>comp28009_c0_seq5 | 61  | Uncharacterized zoneadhesin-like protein | Growth factor receptor cysteine-rich, Chitin binding, TM helix                                                                                              |                                            |

|           |                                                    |    |                                                           |                                                                                         |
|-----------|----------------------------------------------------|----|-----------------------------------------------------------|-----------------------------------------------------------------------------------------|
| <b>23</b> | Hma2.221223<br>XP_012557188.1<br>comp27373_c0_seq1 | 58 | Centromere protein F-like                                 | Coiled-coil                                                                             |
| <b>24</b> | Hma2.227701<br>XP_012554110.1<br>comp27109_c0_seq1 | 57 | Novel                                                     | Coiled-coil                                                                             |
| <b>25</b> | Hma2.200623<br>XP_012556036.1                      | 54 | Novel                                                     | DUF4116                                                                                 |
| <b>26</b> | Hma2.223488<br>XP_002166597.1<br>comp28907_c0_seq1 | 52 | Novel, cnidarian-restricted                               |                                                                                         |
| <b>27</b> | Hma2.209361<br>XP_012562660.1<br>comp28021_c0_seq1 | 51 | Golgin subfamily B member 1-like                          | Coiled-coil                                                                             |
| <b>28</b> | Hma2.225007<br>XP_012555480.1<br>comp20469_c0_seq1 | 51 | NHL repeat-containing protein 2-like                      | Thioredoxin-like, TolB-like/NHL repeat                                                  |
| <b>29</b> | Hma2.205944<br>XP_002170701<br>comp712702_c0_seq1  | 50 | Novel                                                     | Zinc finger C2CH-type domain, harbinger transposase-derived Nuclease domain/THAP domain |
| <b>30</b> | Hma2.213602<br>XP_012563309.1<br>comp24822_c0_seq3 | 42 | Dystrophin                                                | Spectrin repeats, PLAT/LH2, WW, EF hand, EF hand type 2/Zinc finger ZZ type             |
| <b>31</b> | Hma2.232620<br>XP_012555788.1<br>comp25533_c0_seq4 | 42 | Collagen type IV, alpha chain-2                           | Collagen triple-helix                                                                   |
| <b>32</b> | Hma2.229657<br>XP_012566950.1                      | 41 | Novel                                                     | TM helix                                                                                |
| <b>33</b> | Hma2.216831<br>XP_012559234.1                      | 41 | E3 ubiquitin-protein ligase RNF213-like                   |                                                                                         |
| <b>34</b> | Hma2.229673<br>XP_012555349.1<br>comp12798_c0_seq2 | 41 | Novel                                                     | Alpha-L-arabinofuranosidase B/ fascin superfamily $\beta$ -trefoil                      |
| <b>35</b> | Hma2.208777<br>XP_012563382.1                      | 41 | Fibrillin 1-like (partial)                                |                                                                                         |
| <b>36</b> | Hma2.231712<br>XP_012565417.1                      | 40 | Voltage-dependent calcium channel type A, subunit alpha-1 | Ion transport domain, Voltage-dependent channel, four-helix bundle domain               |
| <b>37</b> | Hma2.224063<br>XP_012555935.1                      | 40 | Sec1-like protein                                         | Sec1-like, sec1-like domain 2                                                           |

Unique protein hits resulting from the Orbitrap mass spectrometry analysis are listed in descending order according to their MASCOT protein score. References are given for proteins previously characterized at the protein or mRNA level. Domain annotations were performed as described in the Methods. Transcript IDs were obtained by BLAST searches of the hydra head regeneration transcriptome assemblies on <https://research.nhgri.nih.gov/hydra>.

**Supplementary Table S2. Sequences of siRNAs, qPCR and ChIP primers.**

| <b>siRNA</b>        | <b>nucleotide sequence (5' to 3')</b> |
|---------------------|---------------------------------------|
| siGFP               | TAGATGGTGATGTTAATGGGC                 |
| Scrambled siGFP     | AACUCAUCGAUUCACACCGGUUUU              |
| siTSP1              | AAGATATGGTGCCTATCAGTT                 |
| siTSP2              | CAGATTACTTATAAGTTTTAA                 |
| si $\beta$ -Catenin | AAGGUUAUGAUGAUGAUGAAGUU               |
| siWnt3              | AAAGAGGCUAUAACGUUAAUAUU               |

  

| <b>Gene</b>                  | <b>qPCR Primer Sequences (5' to 3')</b> |
|------------------------------|-----------------------------------------|
| Hm $\beta$ -Catenin fw       | CCTGCTATTGTTGAGGCTGGA                   |
| Hm $\beta$ -Catenin rv       | TCTGCAAGAGTCCTTCTAAACCA                 |
| Hm Wnt3 fw                   | ATTACAACAGCCAGCAGAGAAAG                 |
| Hm Wnt3 rv                   | TTATCGCAACGACAGTGGAC                    |
| HmTSP fw                     | ACCAAATGATCAAGCTGGATCCT                 |
| HmTSP rev                    | ACCACCAAACCTTTCAACTCCA                  |
| $\gamma$ -Tubulin subunit fw | CTGCTTGTGTAGCATACTTTGAAAT               |
| $\gamma$ -Tubulin subunit rv | TCATG TTCAGCTACAAGAAATTCAC              |

  

| <b>TCF binding sites</b>      | <b>ChIP PCR primer sequences (5' to 3')</b> |
|-------------------------------|---------------------------------------------|
| 2 juxtaposed distal sites fw  | CCCGACTGTTGAAACTGC                          |
| 2 juxtaposed distal sites rev | TGTTCTCAAGGCTCACGC                          |
| Proximal site fw              | TTGAAGGCATTTAACAACTTGC                      |
| Proximal site rev             | TGCCCAAATGTAAAGTTCTGTG                      |
| Intronic site fw              | GACAAAACCAAAGAAAAAATG                       |
| Intronic site rev             | TCCCTTGTAATCAGGTTAG                         |
| Control fw                    | ACTTTCATATAAGGCCGCTTC                       |
| Control rev                   | CCCAGCGATATAGAGACTGC                        |

## Supplementary Fig. S1

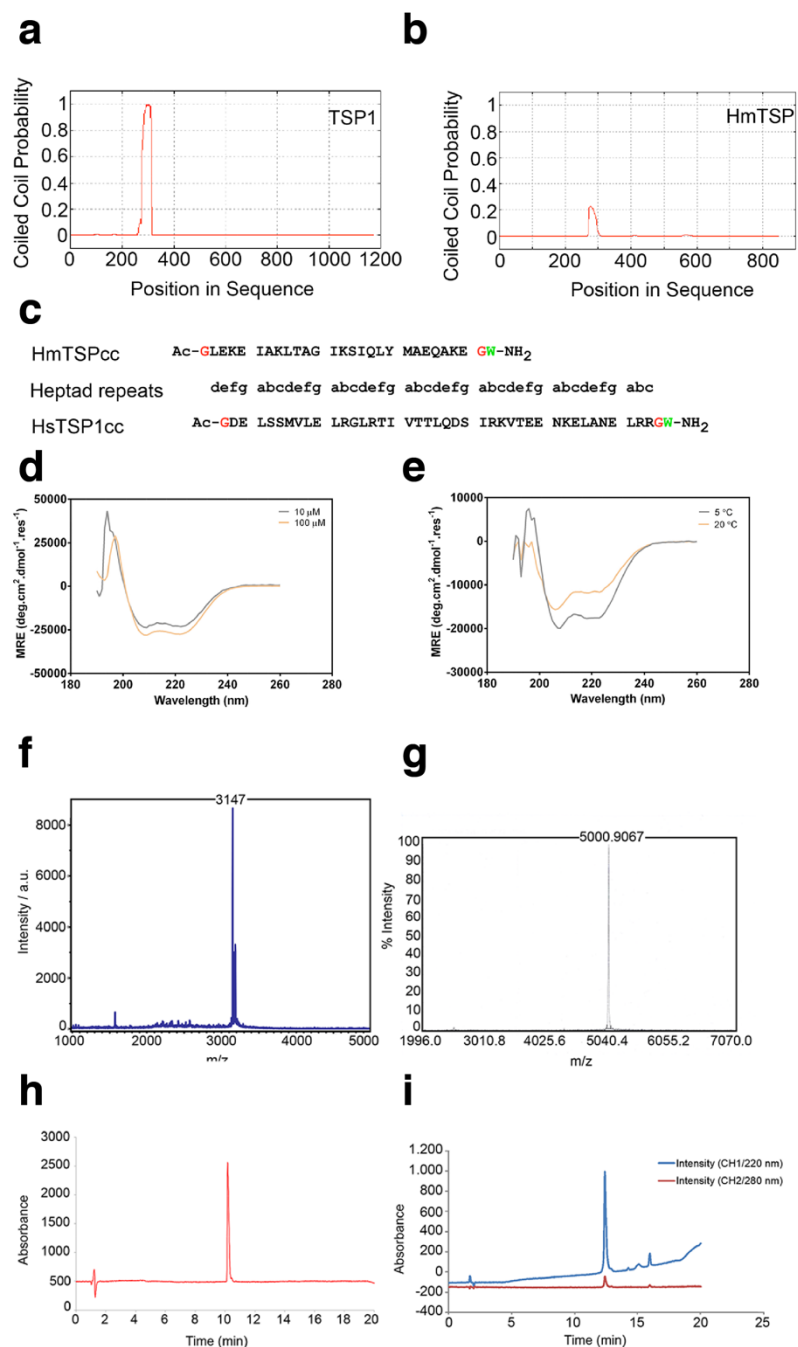

**Fig. S1. Preparation of synthetic peptides from the oligomerization regions of TSP1 and *Hydra* TSP.** **a, b.** Coiled-coil region probabilities in human TSP1 (**a**) or *Hydra* TSP (**b**), as predicted in MARCOIL. **c.** Protein sequences of the synthetic peptides corresponding to the predicted oligomerization regions of *Hydra* TSP (HmTSPcc) and human TSP1 (HsTSP1cc). In each peptide, the native sequence is given in black, added glycines in red and added tryptophan in green. The heptad repeat phase is predicted from MARCOIL. **d, e.** Circular dichroism spectra for HsTSP1cc (**d**) or HmTSPcc (**e**) peptides. HsTSP1cc was analyzed at two concentrations at 5 °C. HmTSPcc was analyzed at 100 μM at 5 °C and 20 °C. MRE = mean residue ellipticity. **f, i.** Quality control for the synthetic peptides. Spectra from MALDI-TOF mass spectrometry for HmTSPcc (**f**) and HsTSP1cc (**g**) peptides. Each identifies a single peak consistent with the predicted mass for each peptide. **h, i.** Traces from RP-HPLC of HmTSPcc (**h**) and HsTSP1cc (**i**) peptides, demonstrating the purity of the preparations.

Supplementary Fig. S2

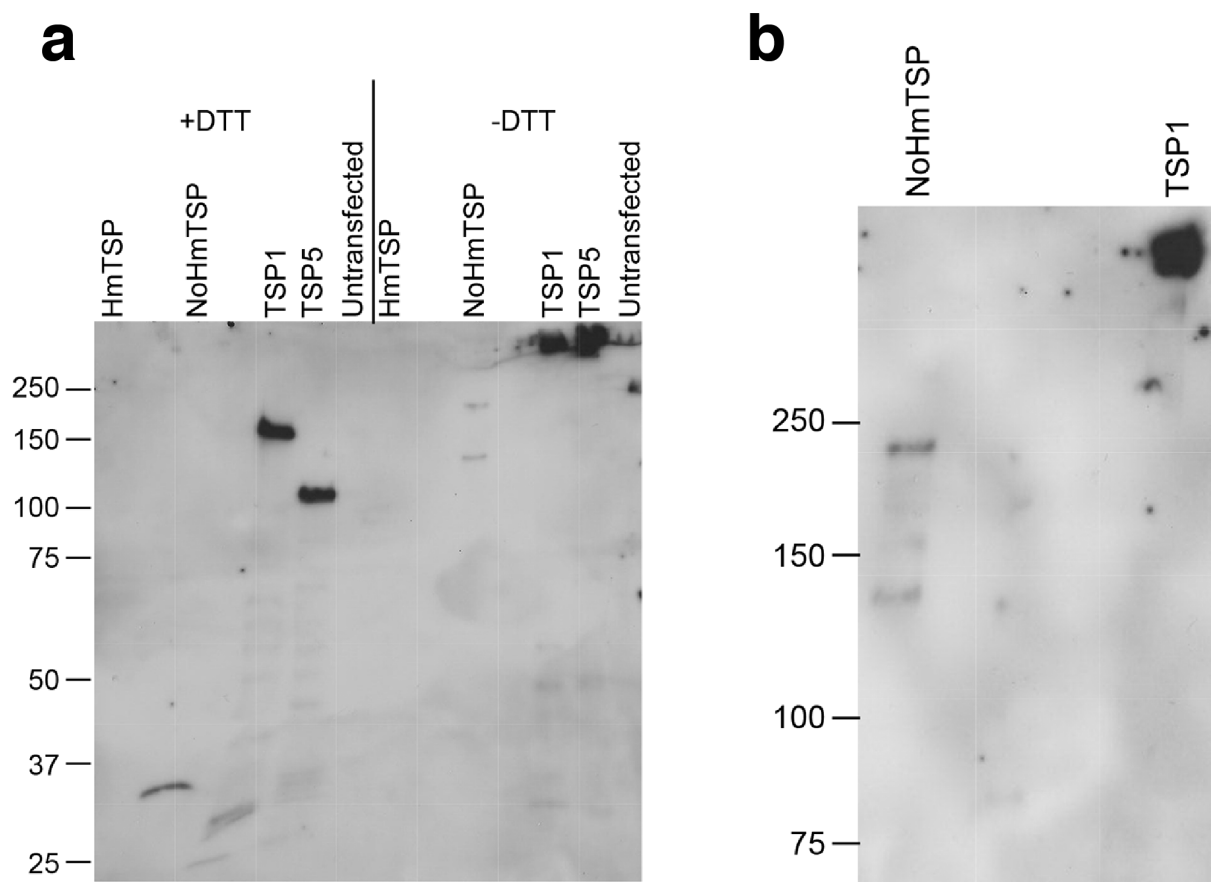

**Fig. S2. Uncropped Western blot images used in Fig. 3d. a.** Recombinant NoHmTSP.V5 and human TSP1.V5 and TSP5.V5 analyzed under reducing and non-reducing conditions, including lanes presented in Fig. 3D, left panel. **b.** Recombinant NoHmTSP and human TSP1 analyzed under non-reducing conditions as presented in Fig. 3d, right panel. Each immunoblot was probed with V5 antibody. To improve resolution of high-molecular weight proteins, some molecular weight markers were run off the bottom of each gel a and b as indicated.

Supplementary Fig. S3

**a**

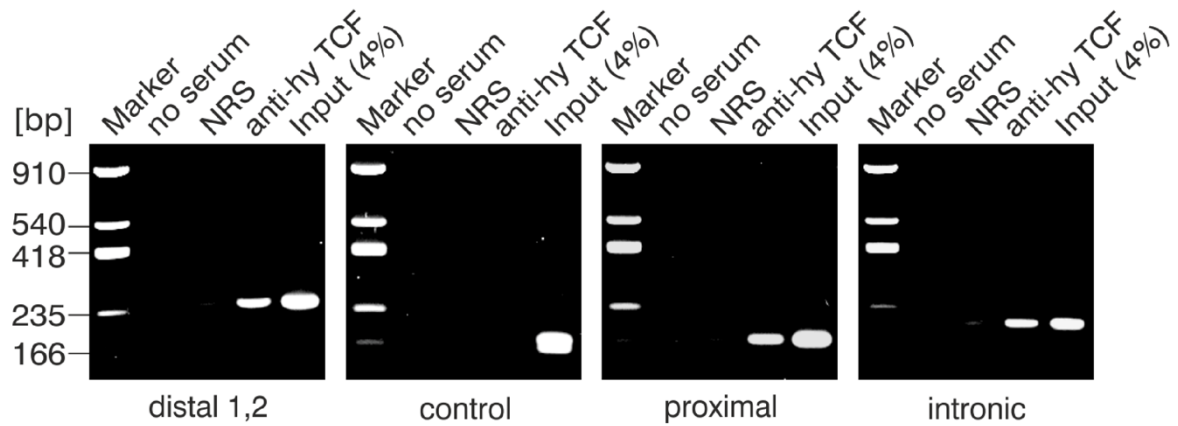

**b**

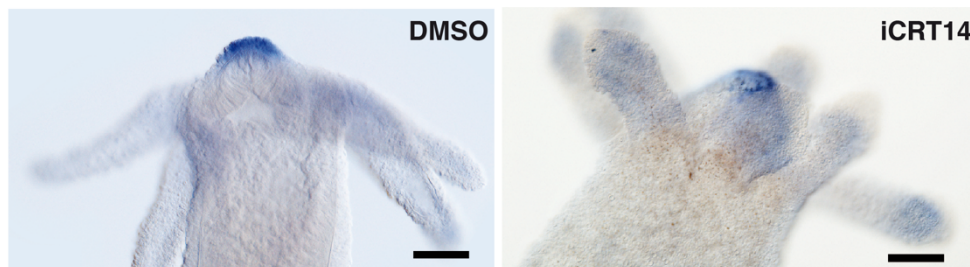

**Fig. S3. Regulation of *HmTSP* expression by  $\beta$ -Catenin.** **a.** Replication of the ChIP experiment analyzing the *Hydra TSP* promoter region (compare Fig. 7b) using an independent chromatin preparation from whole *Hydra* animals. A polyclonal antibody directed against *Hydra* TCF was used for precipitation, followed by PCR amplification of the indicated fragments from the *TSP* regulatory region including a region without TCF binding site (control). Reactions with normal rabbit serum (NRS) or total chromatin (Input) were used as further controls. PCR products were resolved by agarose gel electrophoresis and visualized by ethidium bromide staining. **b.** Representative *HmTSP* expression in DMSO-treated control animal at 72hrs (left) or animal treated with 50  $\mu$ M of  $\beta$ -Catenin inhibitor iCRT14 for 24 h and fixed after 72 hrs. Bars: 500  $\mu$ m.
